# Supplementary material for: Synergistic catalytic effects of oxygen and nitrogen functional groups on active carbon electrodes for all-vanadium redox flow batteries
Source: Royal Society of Chemistry journal article supplement (doi:10.1039/c7ra08334c), 2017-01-01
Supplement: c7ra08334c1.pdf [file c7ra08334c1.pdf]

## Supporting Information

### **Synergistic catalytic effects of oxygen and nitrogen functional groups on active carbon electrodes for all-vanadium redox flow batteries**

**Min Eui Lee,<sup>a</sup> Hyoung-Joon Jin,<sup>\*a</sup> and Young Soo Yun<sup>\*b</sup>**

*<sup>a</sup>WCSL(World Class Smart Lab) of Green Battery Lab., Department of Polymer Science and Engineering, Inha University, 100, Inha-ro, Nam-gu, Incheon 22201, South Korea*

*<sup>b</sup>Department of Chemical Engineering, Kangwon National University, 346, Jungang-ro, Samcheok-si, Gangwon-do 25913, South Korea*

\*These authors contributed equally to this work.

\* E-mail: [hjjin@inha.ac.kr](mailto:hjjin@inha.ac.kr) and [ysyun@kangwon.ac.kr](mailto:ysyun@kangwon.ac.kr)

**Table S1.** Surface properties of CFs and P-CFs prepared with different heat-treatment temperatures.

| Atomic ratio | Sample |           |           |           |            |            |
|--------------|--------|-----------|-----------|-----------|------------|------------|
|              | CFs    | P-CFs-400 | P-CFs-600 | P-CFs-800 | P-CFs-1000 | P-CFs-1200 |
| C/O          | 15.8   | 8.6       | 13.6      | 15.7      | 17.3       | 20.8       |
| C/N          | 84.5   | 12.1      | 17.7      | 30.4      | 32.8       | 52.1       |

**Table S2.** Surface properties of CFs and O-CFs prepared with different heat-treatment temperatures.

| Atomic ratio | Sample |           |           |           |            |            |
|--------------|--------|-----------|-----------|-----------|------------|------------|
|              | CFs    | O-CFs-400 | O-CFs-600 | O-CFs-800 | O-CFs-1000 | O-CFs-1200 |
| C/O          | 15.8   | 4.5       | 8.7       | 10.5      | 11.3       | 15.0       |

**Table S3.** Surface properties of CFs and N-CFs prepared with different heat-treatment temperatures.

| Atomic ratio | Sample |           |           |           |            |            |
|--------------|--------|-----------|-----------|-----------|------------|------------|
|              | CFs    | N-CFs-400 | N-CFs-600 | N-CFs-800 | N-CFs-1000 | N-CFs-1200 |
| C/N          | 84.5   | 7.5       | 12.1      | 13.7      | 22.0       | 34.2       |

**Table S4.** Electrochemical performance from cyclic voltammograms for CFs and O-CFs acquired at a sweep rate of 5 mV s<sup>-1</sup>.

| electrode  | Anode            |                  |              |              |                 |                      | Cathode          |                  |              |              |                 |                      |
|------------|------------------|------------------|--------------|--------------|-----------------|----------------------|------------------|------------------|--------------|--------------|-----------------|----------------------|
|            | $I_{pa}$<br>(mA) | $I_{pc}$<br>(mA) | $V_{pa}$ (V) | $V_{pc}$ (V) | $I_{pa}/I_{pc}$ | $\Delta E_p$<br>(mV) | $I_{pa}$<br>(mA) | $I_{pc}$<br>(mA) | $V_{pa}$ (V) | $V_{pc}$ (V) | $I_{pa}/I_{pc}$ | $\Delta E_p$<br>(mV) |
| CFs        | 50.40            | -57.60           | -0.39        | -0.58        | 0.86            | 363.0                | 39.52            | -33.86           | 1.10         | 0.66         | 1.17            | 435.9                |
| O-CFs-400  | 64.26            | -69.36           | -0.31        | -0.64        | 0.93            | 323.4                | 59.58            | -47.12           | 1.13         | 0.84         | 1.26            | 287.9                |
| O-CFs-600  | 67.30            | -73.06           | -0.32        | -0.65        | 0.92            | 336.9                | 57.91            | -48.47           | 1.16         | 0.85         | 1.03            | 315.0                |
| O-CFs-800  | 62.04            | -68.33           | -0.31        | -0.65        | 0.91            | 345.2                | 61.87            | -59.89           | 1.16         | 0.84         | 1.19            | 322.9                |
| O-CFs-1000 | 64.69            | -67.50           | -0.30        | -0.65        | 0.96            | 353.0                | 60.53            | -50.84           | 1.17         | 0.84         | 1.17            | 331.0                |
| O-CFs-1200 | 64.08            | -70.43           | -0.29        | -0.65        | 0.91            | 359.1                | 67.65            | -57.64           | 1.17         | 0.82         | 1.19            | 342.9                |

**Table S5.** Electrochemical performance from cyclic voltammograms of CFs and N-CFs acquired at a sweep rate of 5 mV s<sup>-1</sup>.

| electrode  | Anode            |                  |              |              |                 |                      | Cathode          |                  |              |              |                 |                      |
|------------|------------------|------------------|--------------|--------------|-----------------|----------------------|------------------|------------------|--------------|--------------|-----------------|----------------------|
|            | $I_{pa}$<br>(mA) | $I_{pc}$<br>(mA) | $V_{pa}$ (V) | $V_{pc}$ (V) | $I_{pa}/I_{pc}$ | $\Delta E_p$<br>(mV) | $I_{pa}$<br>(mA) | $I_{pc}$<br>(mA) | $V_{pa}$ (V) | $V_{pc}$ (V) | $I_{pa}/I_{pc}$ | $\Delta E_p$<br>(mV) |
| CFs        | 50.40            | -57.60           | -0.39        | -0.58        | 0.86            | 363.0                | 39.52            | -33.86           | 1.10         | 0.66         | 1.17            | 435.9                |
| N-CFs-400  | 65.72            | -79.53           | -0.37        | -0.61        | 0.83            | 238.0                | 72.06            | -64.93           | 1.01         | 0.72         | 1.11            | 290.1                |
| N-CFs-600  | 78.37            | -87.30           | -0.36        | -0.66        | 0.90            | 291.8                | 73.88            | -68.01           | 1.06         | 0.75         | 1.09            | 352.4                |
| N-CFs-800  | 74.74            | -81.12           | -0.37        | -0.68        | 0.92            | 311.5                | 83.72            | -71.33           | 1.12         | 0.75         | 1.17            | 366.1                |
| N-CFs-1000 | 76.98            | -84.69           | -0.32        | -0.65        | 0.91            | 327.3                | 74.13            | -67.24           | 1.07         | 0.74         | 1.10            | 375.3                |
| N-CFs-1200 | 70.66            | -76.79           | -0.33        | -0.68        | 0.92            | 352.4                | 79.59            | -69.19           | 1.12         | 0.73         | 1.15            | 385.2                |

**Table S6.** Electrochemical performance from cyclic voltammograms of CFs and P-CFs acquired at a sweep rate of 5 mV s<sup>-1</sup>.

| electrode  | Anode            |                  |              |              |                 |                      | Cathode          |                  |              |              |                 |                      |
|------------|------------------|------------------|--------------|--------------|-----------------|----------------------|------------------|------------------|--------------|--------------|-----------------|----------------------|
|            | $I_{pa}$<br>(mA) | $I_{pc}$<br>(mA) | $V_{pa}$ (V) | $V_{pc}$ (V) | $I_{pa}/I_{pc}$ | $\Delta E_p$<br>(mV) | $I_{pa}$<br>(mA) | $I_{pc}$<br>(mA) | $V_{pa}$ (V) | $V_{pc}$ (V) | $I_{pa}/I_{pc}$ | $\Delta E_p$<br>(mV) |
| CFs        | 50.40            | -57.60           | -0.39        | -0.58        | 0.86            | 363.0                | 39.52            | -33.86           | 1.10         | 0.66         | 1.17            | 435.9                |
| P-CFs-400  | 77.95            | -81.27           | -0.40        | -0.57        | 0.97            | 170.9                | 71.89            | -66.18           | 1.02         | 0.72         | 1.10            | 302.0                |
| P-CFs-600  | 65.87            | -73.72           | -0.40        | -0.59        | 0.89            | 190.4                | 65.31            | -58.57           | 1.06         | 0.68         | 1.11            | 371.4                |
| P-CFs-800  | 51.62            | -53.98           | -0.35        | -0.62        | 0.96            | 278.3                | 58.52            | -56.58           | 1.08         | 0.68         | 1.03            | 395.4                |
| P-CFs-1000 | 60.36            | -67.81           | -0.32        | -0.66        | 0.89            | 341.7                | 58.47            | -54.18           | 1.10         | 0.67         | 1.08            | 425.2                |
| P-CFs-1200 | 63.16            | -70.15           | -0.31        | -0.68        | 0.90            | 371.1                | 67.04            | -55.41           | 1.09         | 0.67         | 1.21            | 420.2                |

**Table S7.** Summary of electrochemical performances of several heteroatom-doped carbon-based electrodes.

| Sample  | Based materials | Doped heteroatom | Electrolyte in CV (reference electrode)                                         | Scan rate (mV s <sup>-1</sup> ) | $\Delta E_p$ (mV) | Ref.     |
|---------|-----------------|------------------|---------------------------------------------------------------------------------|---------------------------------|-------------------|----------|
| P-CFs   | CF*             | O and N          | 0.1 M VOSO <sub>4</sub> +                                                       | 1                               | 75                | Our work |
|         |                 |                  | 2 M H <sub>2</sub> SO <sub>4</sub> (V vs. Ag/AgCl)                              | 5                               | 170               |          |
| N-CB-CF | CF              | O and N          | 0.1 M VOSO <sub>4</sub> +<br>3 M H <sub>2</sub> SO <sub>4</sub> (V vs. Ag/AgCl) | 5                               | 500               | 19       |
| OGF     | GF*             | O                | 0.1 M VOSO <sub>4</sub> +<br>2 M H <sub>2</sub> SO <sub>4</sub> (V vs. Ag/AgCl) | 5                               | 230               | 26       |
| NCS/GF  | GF              | N                | 0.1 M VOSO <sub>4</sub> +<br>2 M H <sub>2</sub> SO <sub>4</sub> (V vs. SCE)     | 1                               | 142               | 37       |

\*CF : carbon felt, GF : graphite felt



**Table S8.** Electrochemical performances of several RFB full cell devices including P-CFs//CFs.

| Cell type | Surface modification              | Electrode materials | Full-cell                                 |                          | Ref.      |
|-----------|-----------------------------------|---------------------|-------------------------------------------|--------------------------|-----------|
|           |                                   |                     | Current density<br>(mA cm <sup>-2</sup> ) | Energy efficiency<br>(%) |           |
|           | -                                 | CFs//CFs            | 100                                       | ~45                      |           |
| Flow cell | Heteroatom doping<br>(Only anode) | P-CFs-400//CFs      | 100                                       | ~66                      | This work |
|           | Thermal treatment                 | TGF//TGF            | 120                                       | ~75                      | 46        |
|           | (Anode and cathode)               | TGF//TGF            | 100                                       | ~81                      | 47        |

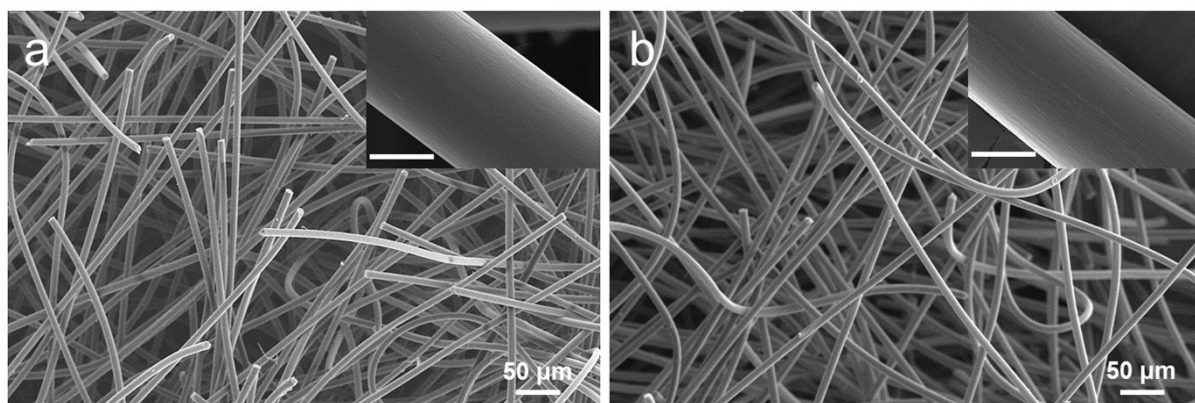

**Figure S1.** FE-SEM images of (a) N-CFs-400 and (b) O-CFs-400 (Inset: high magnification of FE-SEM images, scale bar: 5 μm).

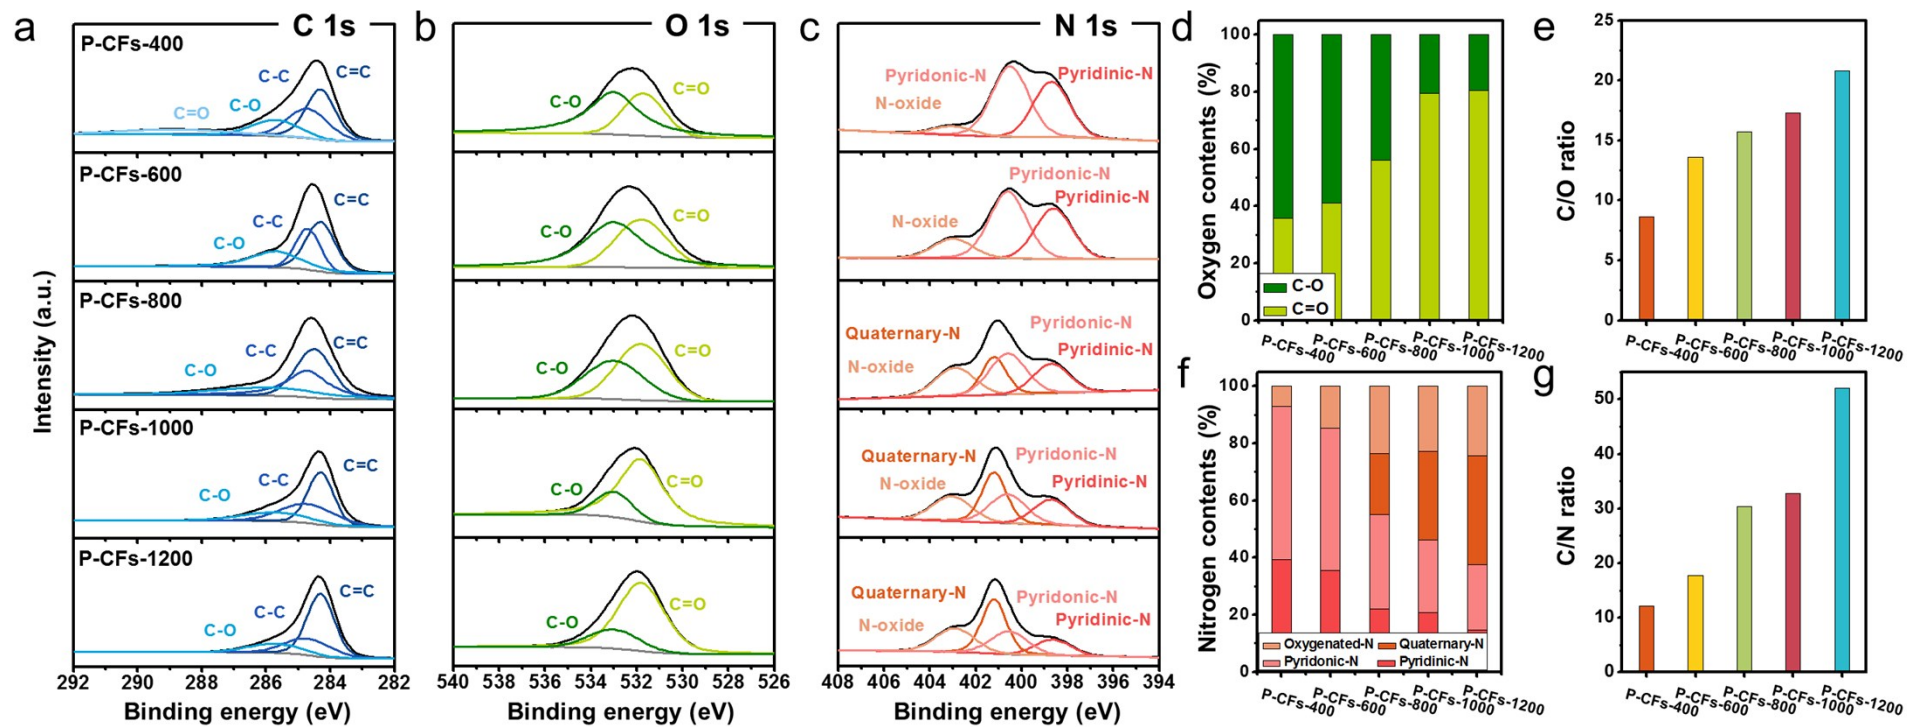

**Figure S2.** XPS analysis of P-CFs prepared at different heat-treatment temperatures. High-resolution (a) C 1s, (b) O 1s, and (c) N 1s spectra. (d) Oxygen chemical composition and (e) content of oxygen functional groups and (f) nitrogen chemical composition and (g) content of nitrogen functional groups.

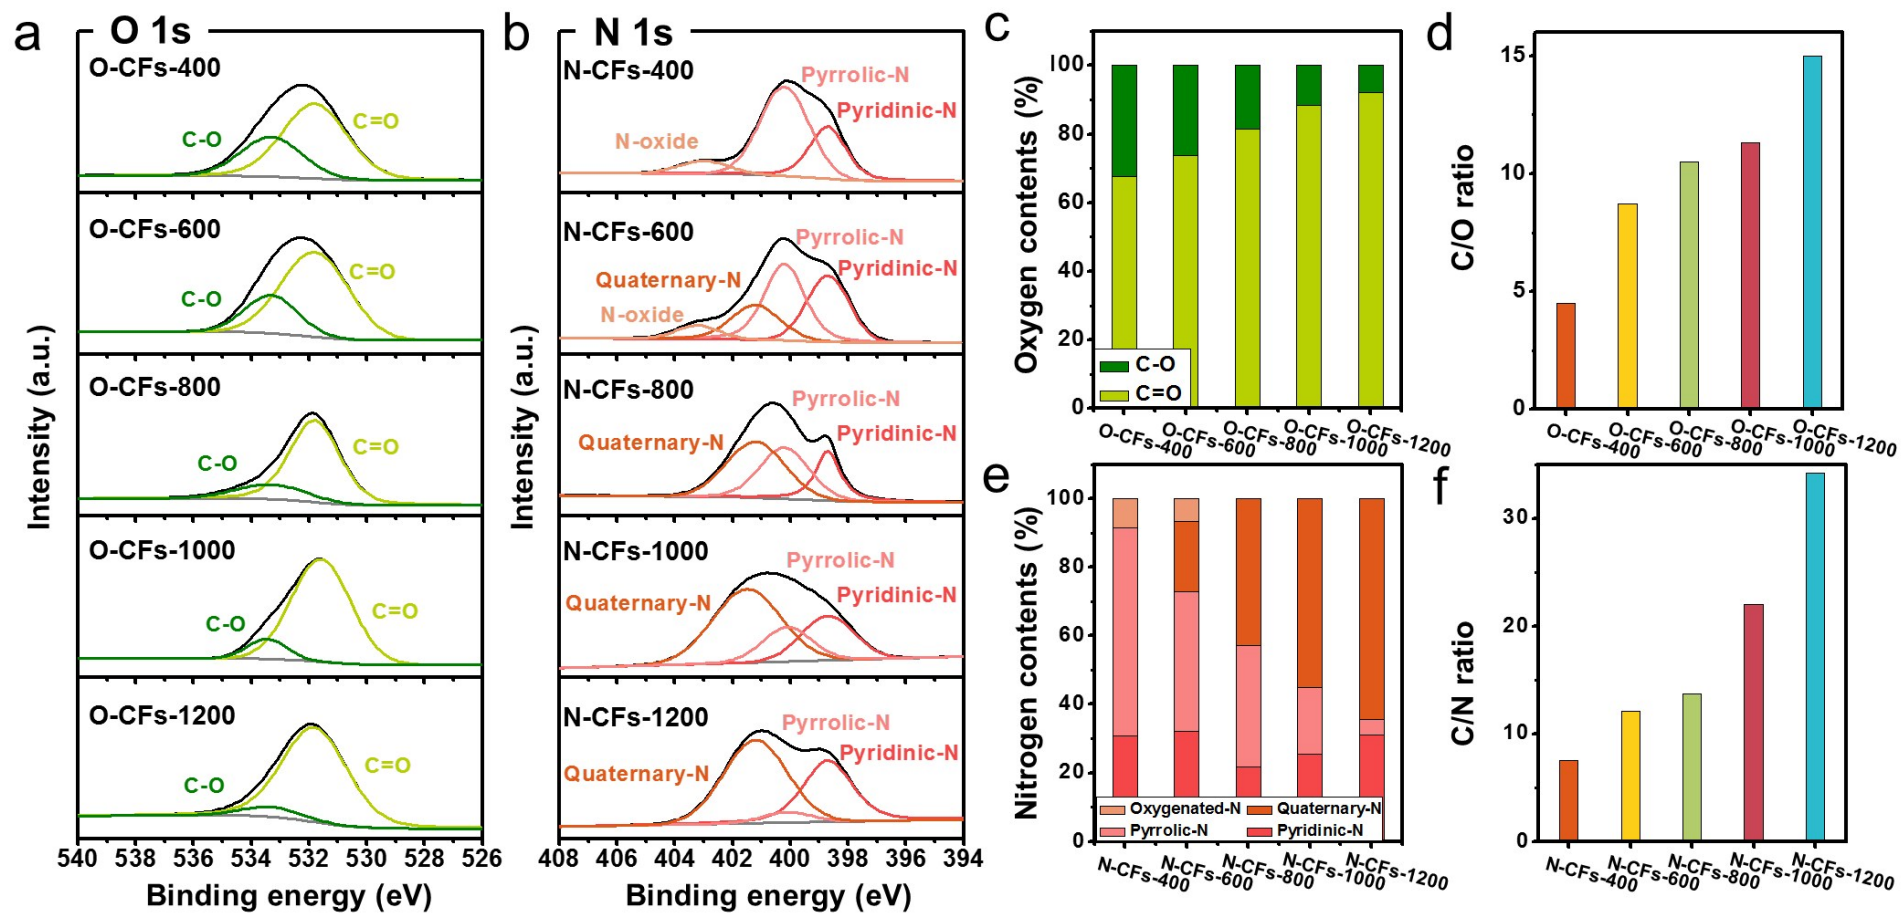

**Figure S3.** XPS analysis of O-CFs and N-CFs prepared at different heat-treatment temperatures. High-resolution (a) O 1s spectra of O-CFs and (b) N 1s spectra of N-CFs. (c) Oxygen chemical composition and (d) content of oxygen functional groups of O-CFs and (e) nitrogen chemical composition and (f) content of nitrogen functional groups of N-CFs.

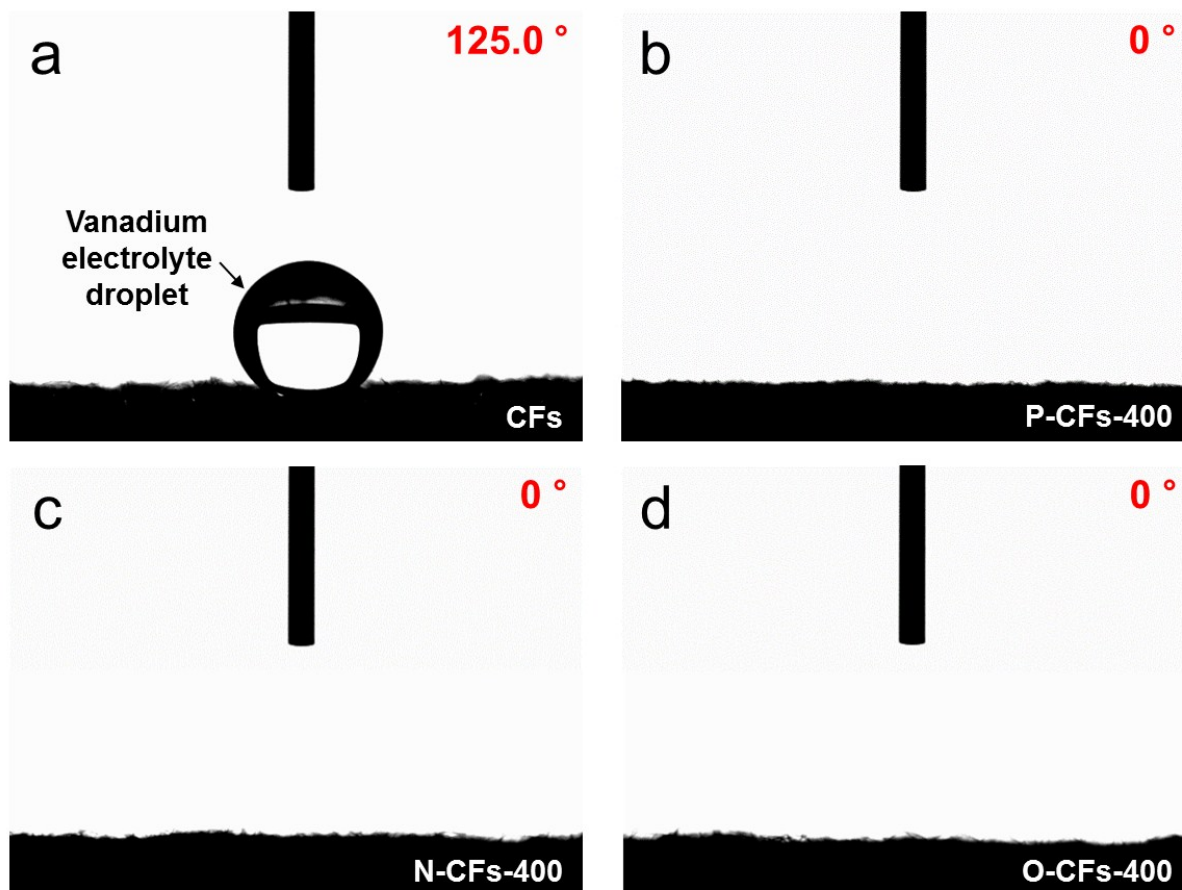

**Figure S4.** Optical images of contact angle measurement using 0.1 M  $\text{VOSO}_4$  dissolved in 2 M  $\text{H}_2\text{SO}_4$  electrolyte on (a) CFs, (b) P-CFs-400, (c) N-CFs-400, and (d) O-CFs-400.

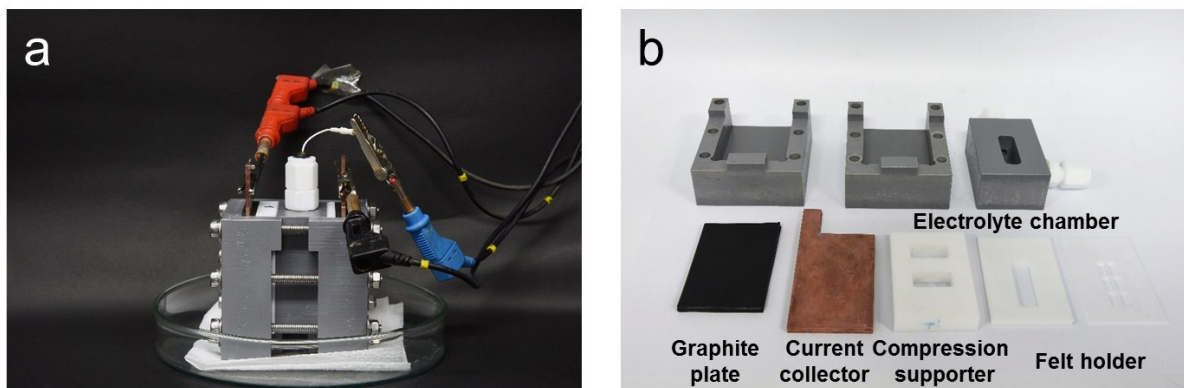

**Figure S5.** (a) Digital photograph of a hand-made three-electrode configuration system and (b) its components.

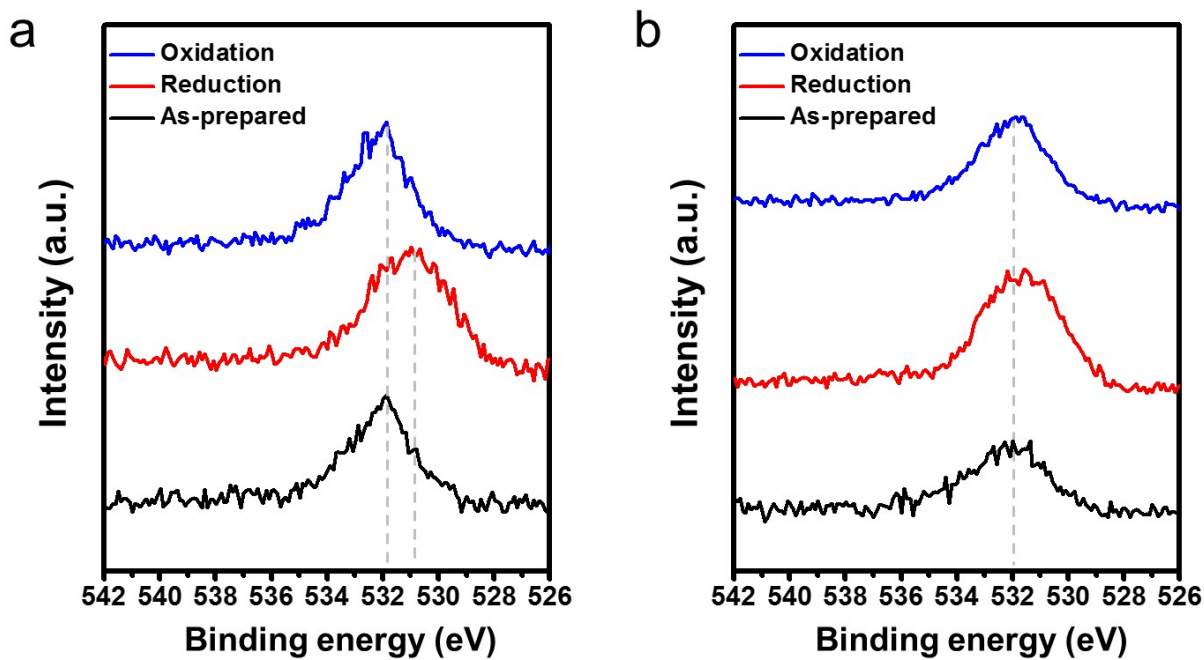

**Figure S6.** Ex-situ O 1s spectra of (a) P-CFs-400 and (b) O-CFs-400 at different states of charge (0, 0.8, and 0 V vs. Ag/AgCl for black, red, and blue, respectively).

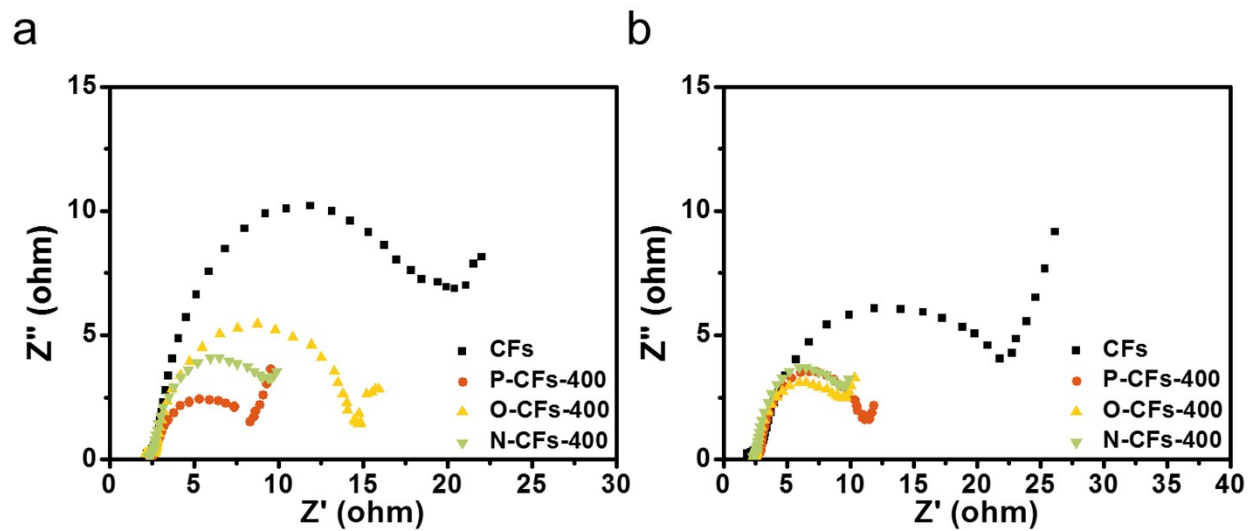

**Figure S7.** Nyquist plots of CFs, P-CFs-400, O-CFs-400 and N-CFs-400 in (a) anolyte and (b) catholyte.



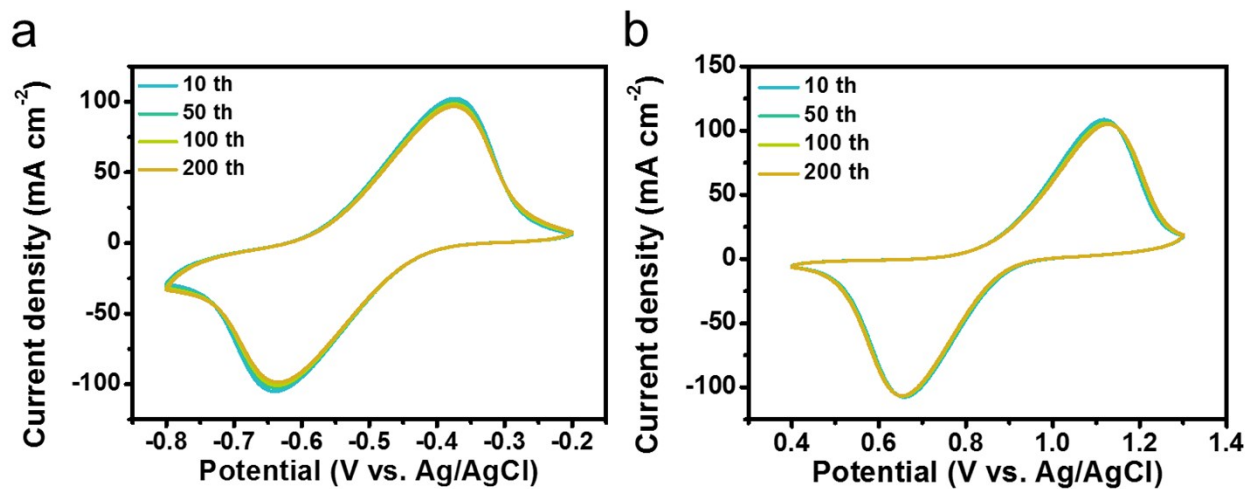

**Figure S8.** Cyclic stability of P-CFs-400 in (a) anolyte and (b) catholyte. (Scan rate : 10 mV s<sup>-1</sup>)

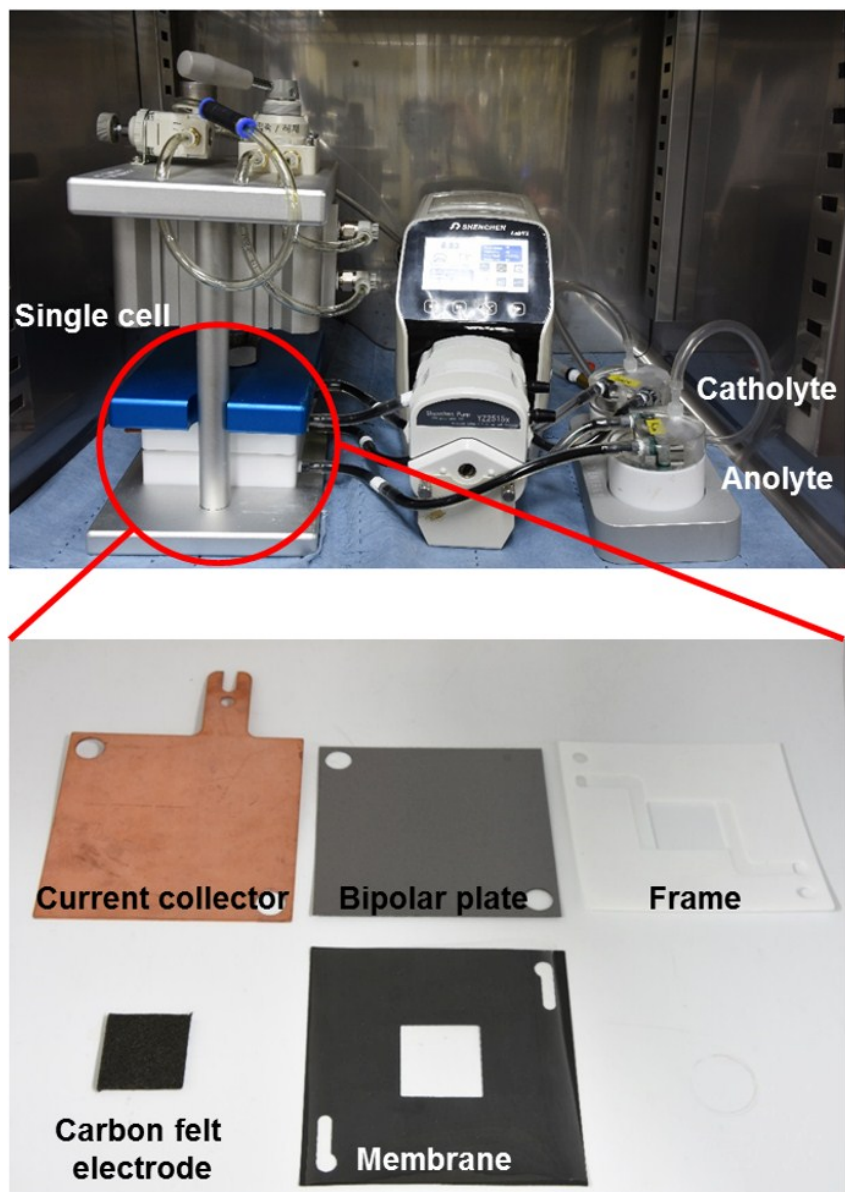

**Figure S9.** Digital photograph of full-cell VRFB systems comprising a single flow cell composed of current collector, bipolar plate, frame, electrode, and membrane.

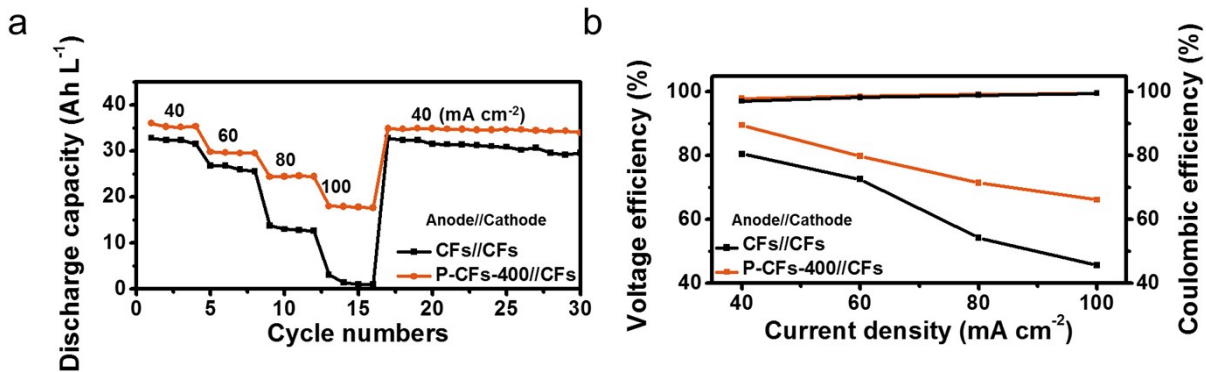

**Figure S10.** (a) Rate performance at current densities from 40 to 100 mA cm<sup>-2</sup> and (b) voltage efficiencies and Coulombic efficiencies as a function of cycle number at different current densities for operation of VRFB single-cell based on CFs//CFs and P-CFs-400//CFs.
